# Supplementary material for: Quercetin loaded folate targeted plasmonic silver nanoparticles for light activated chemo-photothermal therapy of DMBA induced breast cancer in Sprague Dawley rats
Source: Royal Society of Chemistry journal article supplement (doi:10.1039/d0ra05793b), 2020-01-01

# Quercetin loaded folate targeted plasmonic silver nanoparticles for light activated chemophotothermal therapy of DMBA induced breast cancer

## Authors

Pritha Bose<sup>a</sup>, Amiya Priyam<sup>b</sup>, Rajiv Kar<sup>c</sup> and Shakti P Pattanayak<sup>a,d\*</sup>

a) Division of Advanced Pharmacology, Department of Pharm. Sciences & Technology, Birla Institute of Technology, Mesra, Ranchi- 835215

b) Department of Chemistry, School of Physical and Chemical Sciences, Central University of South Bihar, Gaya 823001, India

c) Fritz Haber Centre for Molecular Dynamic Research, Hebrew university of Jerusalem, Israel

d) Department of Pharmacy, School of Health Sciences, Central University of South Bihar, Gaya-824209, India

**\*Corresponding Author:** Dr. Shakti P Pattanayak; **Contact:** +91-9123240698, 0651-2275444/896-Ext. 4832;

**E-mail:** [sppattanayak@cusb.ac.in](mailto:sppattanayak@cusb.ac.in), [profspattanayak@gmail.com](mailto:profspattanayak@gmail.com)

Emails: [pritha2493@gmail.com](mailto:pritha2493@gmail.com), [apriyam@cub.ac.in](mailto:apriyam@cub.ac.in), [rajivkarpharma@gmail.com](mailto:rajivkarpharma@gmail.com)

Fig. 1(S)

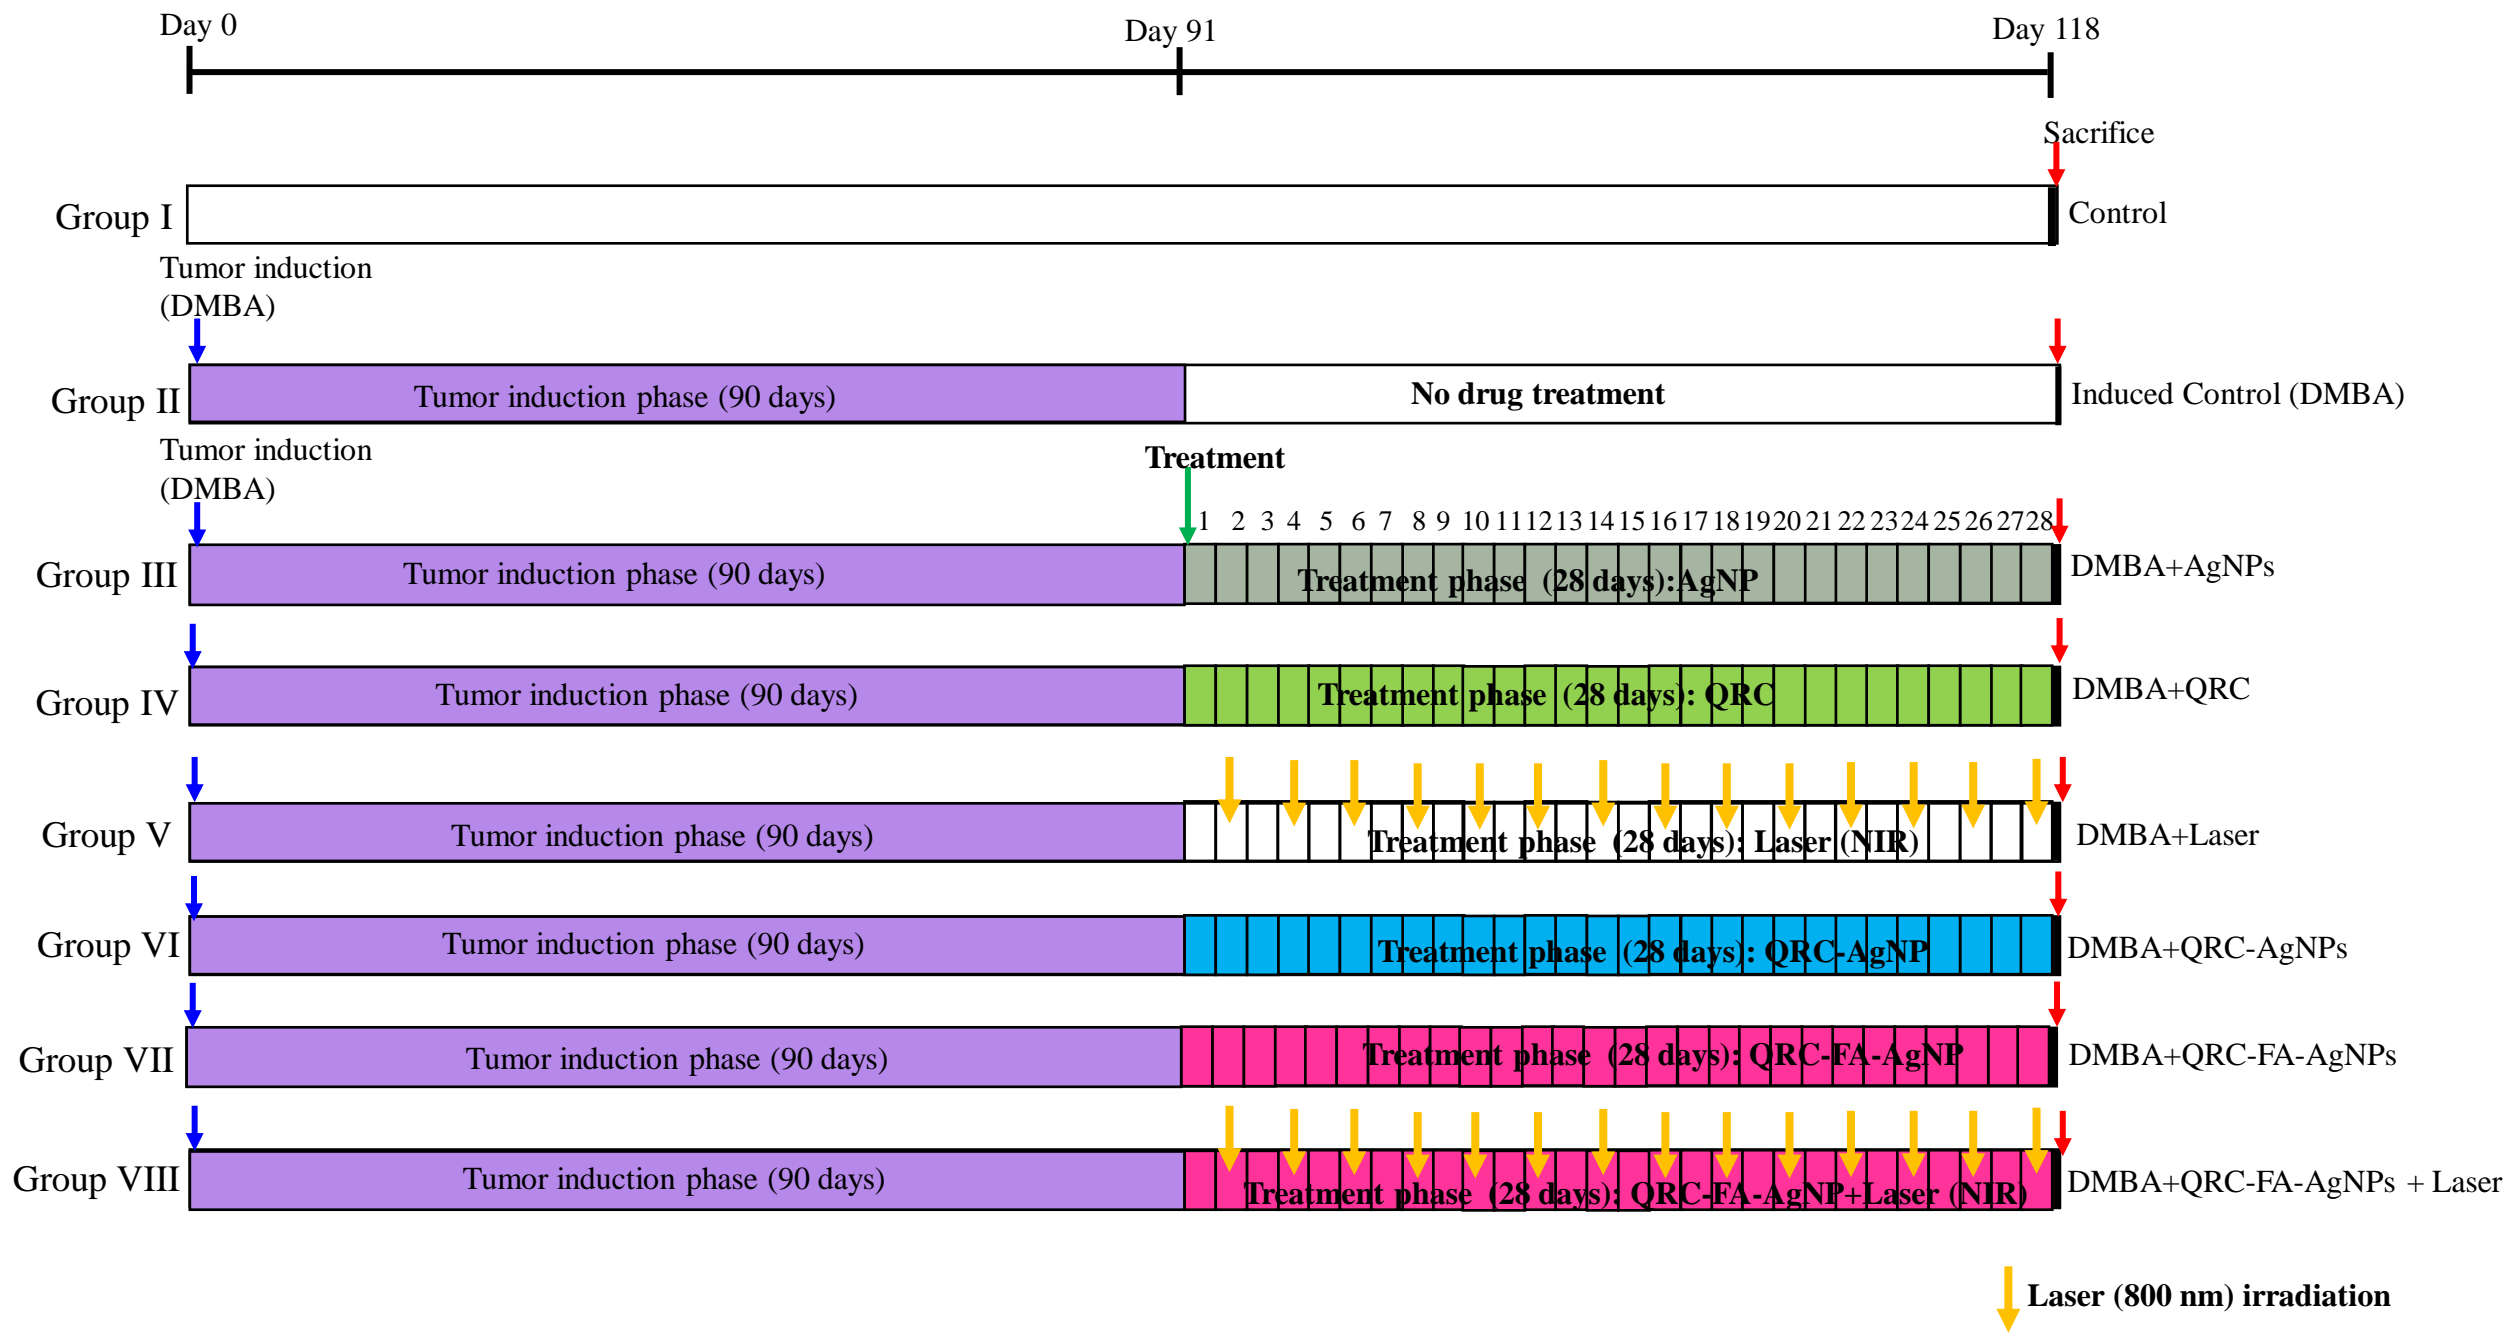

Supplement: d0ra05793b1.pdf [file d0ra05793b1.pdf]
